# Supplementary material
Source: publisher site journal article supplement (https://www.dovepress.com/article/442738)
Supplement: Supplementary file 1 [file get_supplementary_file.php]

**Supplementary Table 1** Full lists of the Inclusion and Exclusion Criteria

| Projects                                             | Inclusion criteria                                                                                                                                                                                                                                                                                                                                                                                                                                                                               | Exclusion criteria                                                                                                                                                                                                                                                                                                                                                                                                                                                                                                                                                                                                                                                                                                                                                                                                                                                                                                                                                                                                                                                                           |
|------------------------------------------------------|--------------------------------------------------------------------------------------------------------------------------------------------------------------------------------------------------------------------------------------------------------------------------------------------------------------------------------------------------------------------------------------------------------------------------------------------------------------------------------------------------|----------------------------------------------------------------------------------------------------------------------------------------------------------------------------------------------------------------------------------------------------------------------------------------------------------------------------------------------------------------------------------------------------------------------------------------------------------------------------------------------------------------------------------------------------------------------------------------------------------------------------------------------------------------------------------------------------------------------------------------------------------------------------------------------------------------------------------------------------------------------------------------------------------------------------------------------------------------------------------------------------------------------------------------------------------------------------------------------|
| The weight-loss intervention study(ChiCTR1800015923) | <ul style="list-style-type: none"> <li>(1) Aged 18 to 60 years;</li> <li>(2) Body mass index <math>\geq 30.0</math> kg/m<sup>2</sup>, or <math>\geq 28.0</math> kg/m<sup>2</sup> with one or more comorbidities (hypertension, impaired glucose tolerance, sleep apnea, dyslipidemia);</li> <li>(3) Stable body weight within 3 months;</li> <li>(4) Contraception agreed by women of reproductive age during the whole study;</li> <li>(5) Understand and sign the informed consent.</li> </ul> | <ul style="list-style-type: none"> <li>(1) Existed diabetes or diabetes diagnosed in the screening stage;</li> <li>(2) Secondary obesity (such as Cushing's syndrome, hypothyroidism);</li> <li>(3) Long-term use of drugs that lead to obesity (such as glucocorticoids);</li> <li>(4) Severe infection, severe injuries, severe and acute cardiovascular and cerebrovascular diseases, or in operation period;</li> <li>(5) A history of malignancy;</li> <li>(6) A history of psychiatric illness or neurological diseases;</li> <li>(7) Combined with rheumatic and immune diseases;</li> <li>(8) Serum TG level more than 11.3 mmol/L;</li> <li>(9) Usage of weight-loss drugs (including GLP-1 receptor agonist) or a history of bariatric surgery within three months;</li> <li>(10) A history or a family history of thyroid medullary carcinoma (MTC), or type 2 multiple endocrine adenoma syndrome (MEN);</li> <li>(11) A history of pancreatitis.</li> <li>(12) Female during pregnancy or lactation;</li> <li>(13) Participate in other clinical trials within three</li> </ul> |

|                                                                                                                  |                                                                                                                                                                                                                                                                                                                                                                                                                                                                                                                                                                                                                                                                                                                                                                                                                                                             |                                                                                                                                                                                                                                                                                                                                                                                                                                                                                                                                                                                                                                                                                                                                                         |
|------------------------------------------------------------------------------------------------------------------|-------------------------------------------------------------------------------------------------------------------------------------------------------------------------------------------------------------------------------------------------------------------------------------------------------------------------------------------------------------------------------------------------------------------------------------------------------------------------------------------------------------------------------------------------------------------------------------------------------------------------------------------------------------------------------------------------------------------------------------------------------------------------------------------------------------------------------------------------------------|---------------------------------------------------------------------------------------------------------------------------------------------------------------------------------------------------------------------------------------------------------------------------------------------------------------------------------------------------------------------------------------------------------------------------------------------------------------------------------------------------------------------------------------------------------------------------------------------------------------------------------------------------------------------------------------------------------------------------------------------------------|
| <p>Individualized multidisciplinary weight management in patients with metabolic syndrome (ChiCTR1900022948)</p> | <p>(1) Aged 18 to 65 years;<br/> (2) Waist circumference <math>\geq</math> 90cm in men or <math>\geq</math>85cm in women;<br/> (3) two or more comorbidities ; ① high blood pressure: systolic/diastolic blood pressure <math>\geq</math>130/85 mmHg or treatment for hypertension, ② low HDL cholesterol: HDL cholesterol <math>&lt;</math> 40mg/dL in men or <math>&lt;</math> 50mg/dL in women, ③ hypertriglyceridemia: serum triglycerides <math>\geq</math>150 mg/dL, or treatment for hypertriglyceridemia, ④ hyperglycemia: fasting blood glucose <math>\geq</math>110 mg/dL or 2h postprandial glucose <math>\geq</math>140 mg/dL or treatment for diabetes.<br/> (4) Stable body weight within 3 months;<br/> (5) Contraception agreed by women of reproductive age during the whole study;<br/> (6) Understand and sign the informed consent.</p> | <p>months;<br/> (14) Unable, unwilling or unwilling to comply with the research requirements, including lifestyle modification, return visit, dose description and subject responsibility.<br/> (1) Secondary obesity such as hypothyroidism, Cushing's syndrome, or long-term use of drugs that lead to obesity;<br/> (2) Chronic diseases of heart, brain, liver, kidney and other organs that require a special diet or affect exercise;<br/> (3) Rheumatic and immune diseases, hematological diseases or a history of malignancy;<br/> (4) Female during pregnancy or lactation;<br/> (5) Unable, unwilling or unwilling to comply with the research requirements, including lifestyle modification, return visit, and subject responsibility.</p> |
|------------------------------------------------------------------------------------------------------------------|-------------------------------------------------------------------------------------------------------------------------------------------------------------------------------------------------------------------------------------------------------------------------------------------------------------------------------------------------------------------------------------------------------------------------------------------------------------------------------------------------------------------------------------------------------------------------------------------------------------------------------------------------------------------------------------------------------------------------------------------------------------------------------------------------------------------------------------------------------------|---------------------------------------------------------------------------------------------------------------------------------------------------------------------------------------------------------------------------------------------------------------------------------------------------------------------------------------------------------------------------------------------------------------------------------------------------------------------------------------------------------------------------------------------------------------------------------------------------------------------------------------------------------------------------------------------------------------------------------------------------------|

**Supplementary Table 2** Correlations between values of anthropometric indicators, body composition and AHI

|             | Body weight | BMI    | NC      | WC      | WHR     | SMM     | FM      | FFM     | PBF      | BMFR     | AHI     |
|-------------|-------------|--------|---------|---------|---------|---------|---------|---------|----------|----------|---------|
| Body weight | 1           | 0.816* | 0.737** | 0.869** | 0.515** | 0.846** | 0.731** | 0.861** | 0.009    | -0.006   | 0.382** |
| BMI         |             | 1      | 0.500** | 0.866** | 0.440** | 0.487** | 0.910** | 0.501** | 0.441**  | 0.501**  | 0.318** |
| NC          |             |        | 1       | 0.676** | 0.669** | 0.827** | 0.318** | 0.824** | -0.338** | 0.344**  | 0.513** |
| WC          |             |        |         | 1       | 0.727** | 0.671** | 0.768** | 0.663** | 0.188**  | -0.184*  | 0.423** |
| WHR         |             |        |         |         | 1       | 0.577** | 0.273*  | 0.546** | -0.183*  | 0.190*   | 0.534** |
| SMM         |             |        |         |         |         | 1       | 0.310** | 0.989** | -0.460** | 0.462**  | 0.392** |
| FM          |             |        |         |         |         |         | 1       | 0.328** | 0.655**  | -0.653** | 0.181*  |
| FFM         |             |        |         |         |         |         |         | 1       | -0.445** | 0.447**  | 0.402** |
| PBF         |             |        |         |         |         |         |         |         | 1        | -1.000** | -0.173* |
| BMFR        |             |        |         |         |         |         |         |         |          | 1        | 0.180*  |
| AHI         |             |        |         |         |         |         |         |         |          |          | 1       |

Notes: \* $p < 0.05$ , \*\* $p < 0.01$ .

Abbreviations: BMI, body mass index; NC, neck circumference; WC, waist circumference; WHR, waist-hip ratio; SMM skeletal muscle mass; FM, fat mass; FFM, fat free mass; PBF, percentage of body fat; BMFR, body muscle-fat ratio.

**Supplementary Table 3** Simple liner regression analysis between anthropometric indicators, body composition and log (AHI)

|                             | $\beta$ (SE)  | $\beta'$ | $R^2$ | <i>Adjusted R<sup>2</sup></i> | <i>P value</i> |
|-----------------------------|---------------|----------|-------|-------------------------------|----------------|
| Demographic characteristics |               |          |       |                               |                |
| Age                         | 1.010(0.436)  | 0.196    | 0.038 | 0.031                         | 0.022          |
| Anthropometric measurements |               |          |       |                               |                |
| Body weight                 | 2.900(0.595)  | 0.388    | 0.150 | 0.144                         | <0.001         |
| BMI                         | 3.246(0.910)  | 0.295    | 0.087 | 0.080                         | 0.001          |
| NC                          | 4.179(0.956)  | 0.354    | 0.126 | 0.119                         | <0.001         |
| WC                          | 5.186(0.957)  | 0.424    | 0.180 | 0.174                         | <0.001         |
| WHR                         | 9.430(1.464)  | 0.501    | 0.251 | 0.245                         | <0.001         |
| Body composition            |               |          |       |                               |                |
| SMM                         | 0.873(0.353)  | 0.209    | 0.044 | 0.036                         | 0.015          |
| FM                          | 1.108(0.444)  | 0.211    | 0.044 | 0.037                         | 0.014          |
| FFM                         | 2.744(0.535)  | 0.405    | 0.164 | 0.158                         | <0.001         |
| PBF                         | -0.718(0.687) | -0.090   | 0.008 | 0.001                         | 0.298          |
| BMFR                        | 0.493(0.430)  | 0.099    | 0.010 | 0.020                         | 0.254          |

Notes:  $R^2$ , *R-square*;  $\beta$ , unstandardized beta coefficients;  $\beta'$ , standardized beta coefficients.

Abbreviations: BMI, body mass index; NC, neck circumference; WC, waist circumference; WHR, waist-hip ratio; SMM skeletal muscle mass; FM, fat mass; FFM, fat free mass; PBF, percentage of body fat; BMFR, body muscle-fat ratio.

**Supplementary Table 4** Correlations between percent change in body weight and percent changes in anthropometric indicators and body composition among patients with OSA

|                             | Unadjusted |                | Adjusted <sup>a</sup> |                |
|-----------------------------|------------|----------------|-----------------------|----------------|
|                             | Rho        | <i>P</i> value | Rho                   | <i>P</i> value |
| Anthropometric measurements |            |                |                       |                |
| BMI                         | 0.998      | <0.001         | 0.998                 | <0.001         |
| NC                          | 0.557      | <0.001         | 0.507                 | <0.001         |
| WC                          | 0.857      | <0.001         | 0.847                 | <0.001         |
| WHR                         | 0.500      | <0.001         | 0.448                 | <0.001         |
| Body composition            |            |                |                       |                |
| SMM                         | 0.549      | <0.001         | 0.530                 | <0.001         |
| FM                          | 0.899      | <0.001         | 0.989                 | <0.001         |
| FFM                         | 0.534      | <0.001         | 0.485                 | <0.001         |
| PBF                         | 0.786      | <0.001         | 0.789                 | <0.001         |
| BMFR                        | -0.776     | <0.001         | -0.776                | <0.001         |

Notes: <sup>a</sup>All models corrected for age, gender and percent change in AHI.

Abbreviations: BMI, body mass index; NC, neck circumference; WC, waist circumference; WHR, waist-hip ratio; SMM skeletal muscle mass; FM, fat mass; FFM, fat free mass; PBF, percentage of body fat; BMFR, body muscle-fat ratio.

**Supplementary Table 5** Correlations between percent change in AHI and percent changes in anthropometric indicators and body composition among patients with OSA

|                             | Unadjusted |         | Adjusted <sup>a</sup> |         |
|-----------------------------|------------|---------|-----------------------|---------|
|                             | Rho        | P value | Rho                   | P value |
| Anthropometric measurements |            |         |                       |         |
| BMI                         | 0.332      | 0.010   | 0.061                 | 0.650   |
| NC                          | 0.302      | 0.019   | 0.157                 | 0.244   |
| WC                          | 0.406      | 0.001   | 0.271                 | 0.041   |
| WHR                         | 0.309      | 0.016   | 0.188                 | 0.162   |
| Body composition            |            |         |                       |         |
| SMM                         | 0.341      | 0.008   | 0.181                 | 0.178   |
| FM                          | 0.271      | 0.036   | -0.062                | 0.645   |
| FFM                         | 0.307      | 0.017   | 0.162                 | 0.229   |
| PBF                         | 0.216      | 0.098   | -0.076                | 0.573   |
| BMFR                        | -0.203     | 0.121   | 0.089                 | 0.508   |

Notes: <sup>a</sup>All models corrected for age, gender and percent change in weight.

Abbreviations: BMI, body mass index; NC, neck circumference; WC, waist circumference; WHR, waist-hip ratio; SMM skeletal muscle mass; FM, fat mass; FFM, fat free mass; PBF, percentage of body fat; BMFR, body muscle-fat ratio.

**Supplementary Table 6** Single mediator model evaluating percent changes in anthropometric indicators and body composition as mediators of the relationship between percent changes in body weight and AHI

|                             | Indirect Effect (Bias-Corrected 95% CI) |                           |
|-----------------------------|-----------------------------------------|---------------------------|
|                             | Unstandardized                          | Standardized <sup>a</sup> |
| Anthropometric measurements |                                         |                           |
| BMI                         | 7.896(-45.184,81.650)                   | 9.406(-51.017,82.492)     |
| NC                          | 0.923(-0.342,2.919)                     | 0.962(-0.378,3.003)       |
| WC                          | 3.840(1.049,6.895)                      | 4.272(0.936,7.999)        |
| WHR                         | 0.924(-0.096,2.080)                     | 1.007(-0.140,2.405)       |
| Body composition            |                                         |                           |
| SMM                         | 1.128(-0.743,4.295)                     | 1.183(-0.758,4.290)       |
| FM                          | -1.136(-6.849,3.616)                    | -1.219(-7.269,3.919)      |
| FFM                         | 0.943(-1.068,4.037)                     | 0.942(-1.045,3.674)       |
| PBF                         | -0.845(-4.580,2.272)                    | -0.929(-4.830,2.535)      |
| BMFR                        | -0.992(-5.014,2.046)                    | -1.040(-5.356,2.204)      |

Notes: <sup>a</sup>All models corrected for age and gender.

Abbreviations: BMI, body mass index; NC, neck circumference; WC, waist circumference; WHR, waist-hip ratio; SMM skeletal muscle mass; FM, fat mass; FFM, fat free mass; PBF, percentage of body fat; BMFR, body muscle-fat ratio.

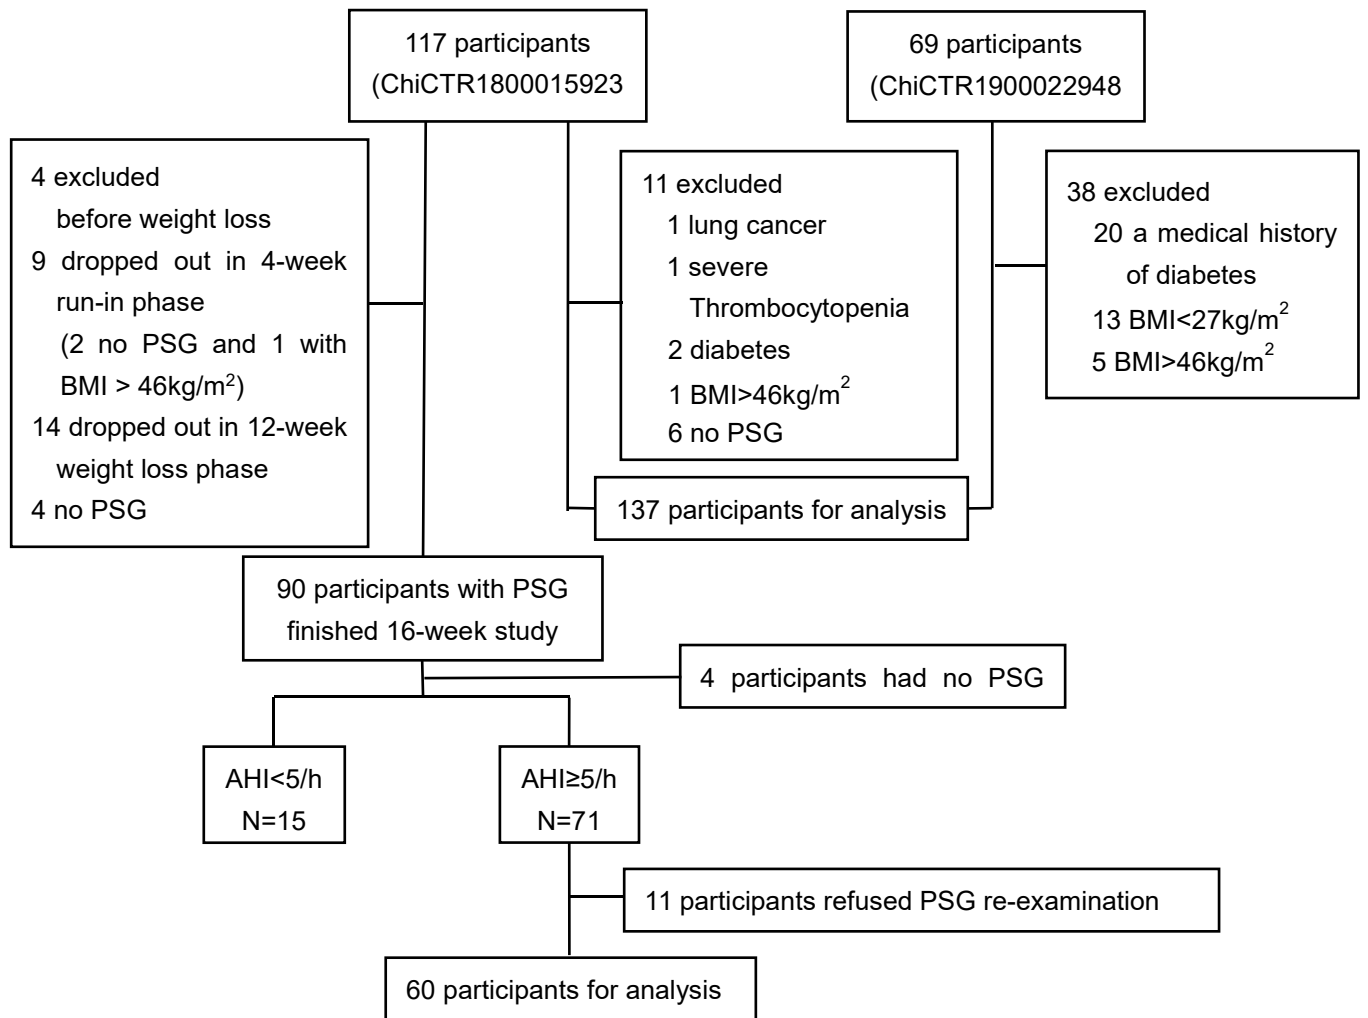

**Supplementary Figure 1**—Flow-chart of Participants' Study Process



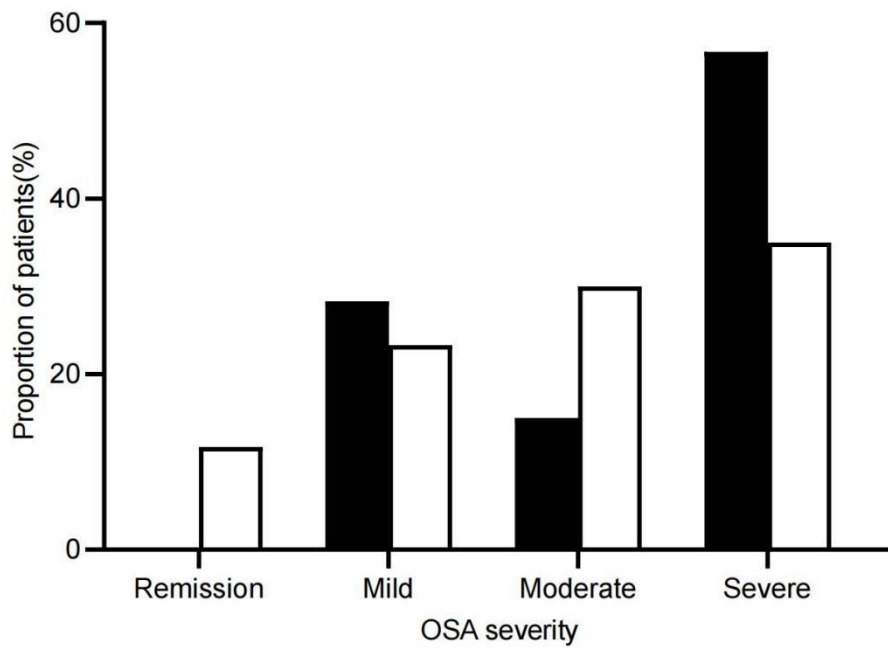

**Supplementary Figure 2** Proportions of patients with different OSA severity at baseline and after the 12-week weight loss management. Notes: Remission,  $AHI < 5$  events/h; Mild,  $5 \leq AHI < 15$  events/h; Moderate,  $15 \leq AHI < 30$  events/h; Severe,  $\geq 30$  events/h. Baseline, black bar; Follow-up, white bar. **Abbreviations:** OSA, obstructive sleep apnea; AHI, apnoea-hypopnoea index.
